# Supplementary material for: Role Played by Paraoxonase-2 Enzyme in Cell Viability, Proliferation and Sensitivity to Chemotherapy of Oral Squamous Cell Carcinoma Cell Lines
Source: MDPI journal article supplement (doi:10.3390/ijms24010338), 2022-12-25
Supplement: s1 [file s1]

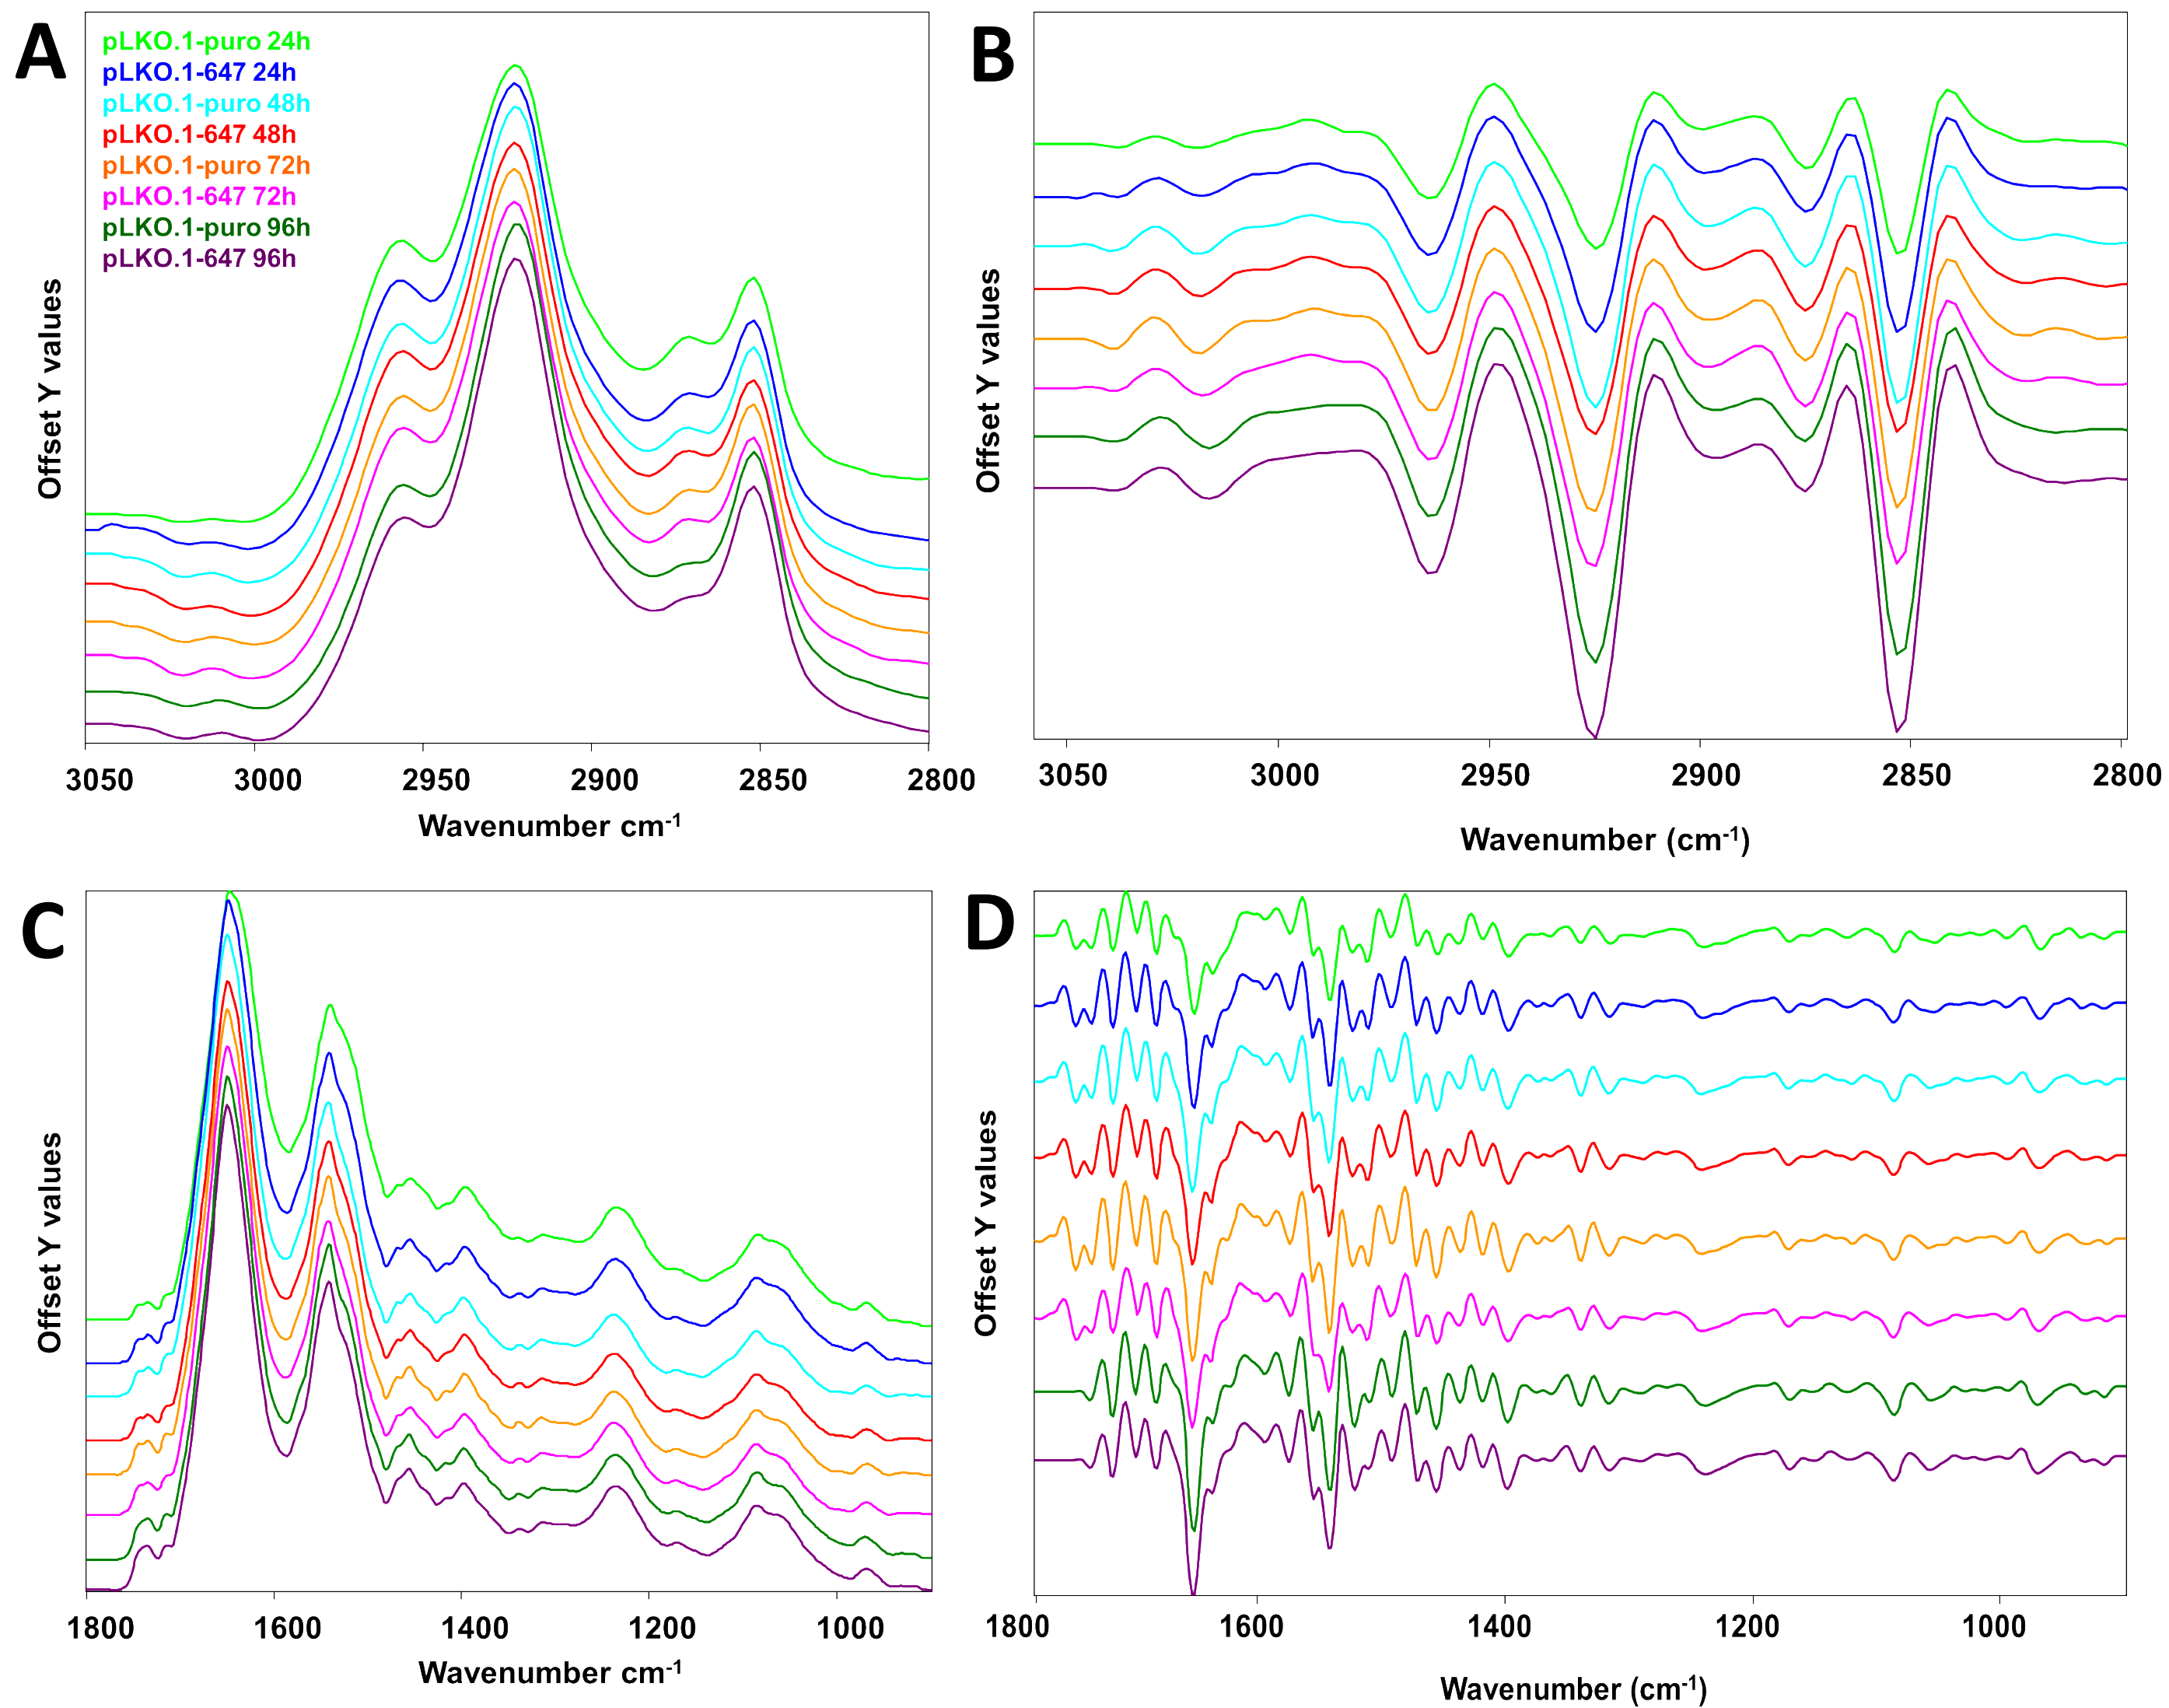

**Figure S1.** HSC3 IR spectra shifted along Y axis for a better comprehension and reported in 3050-2800  $\text{cm}^{-1}$  spectral range in absorbance values **A**), and in second derivative mode **B**); in 1800-900  $\text{cm}^{-1}$  spectral range in absorbance values **C**), and in second derivative mode **D**).

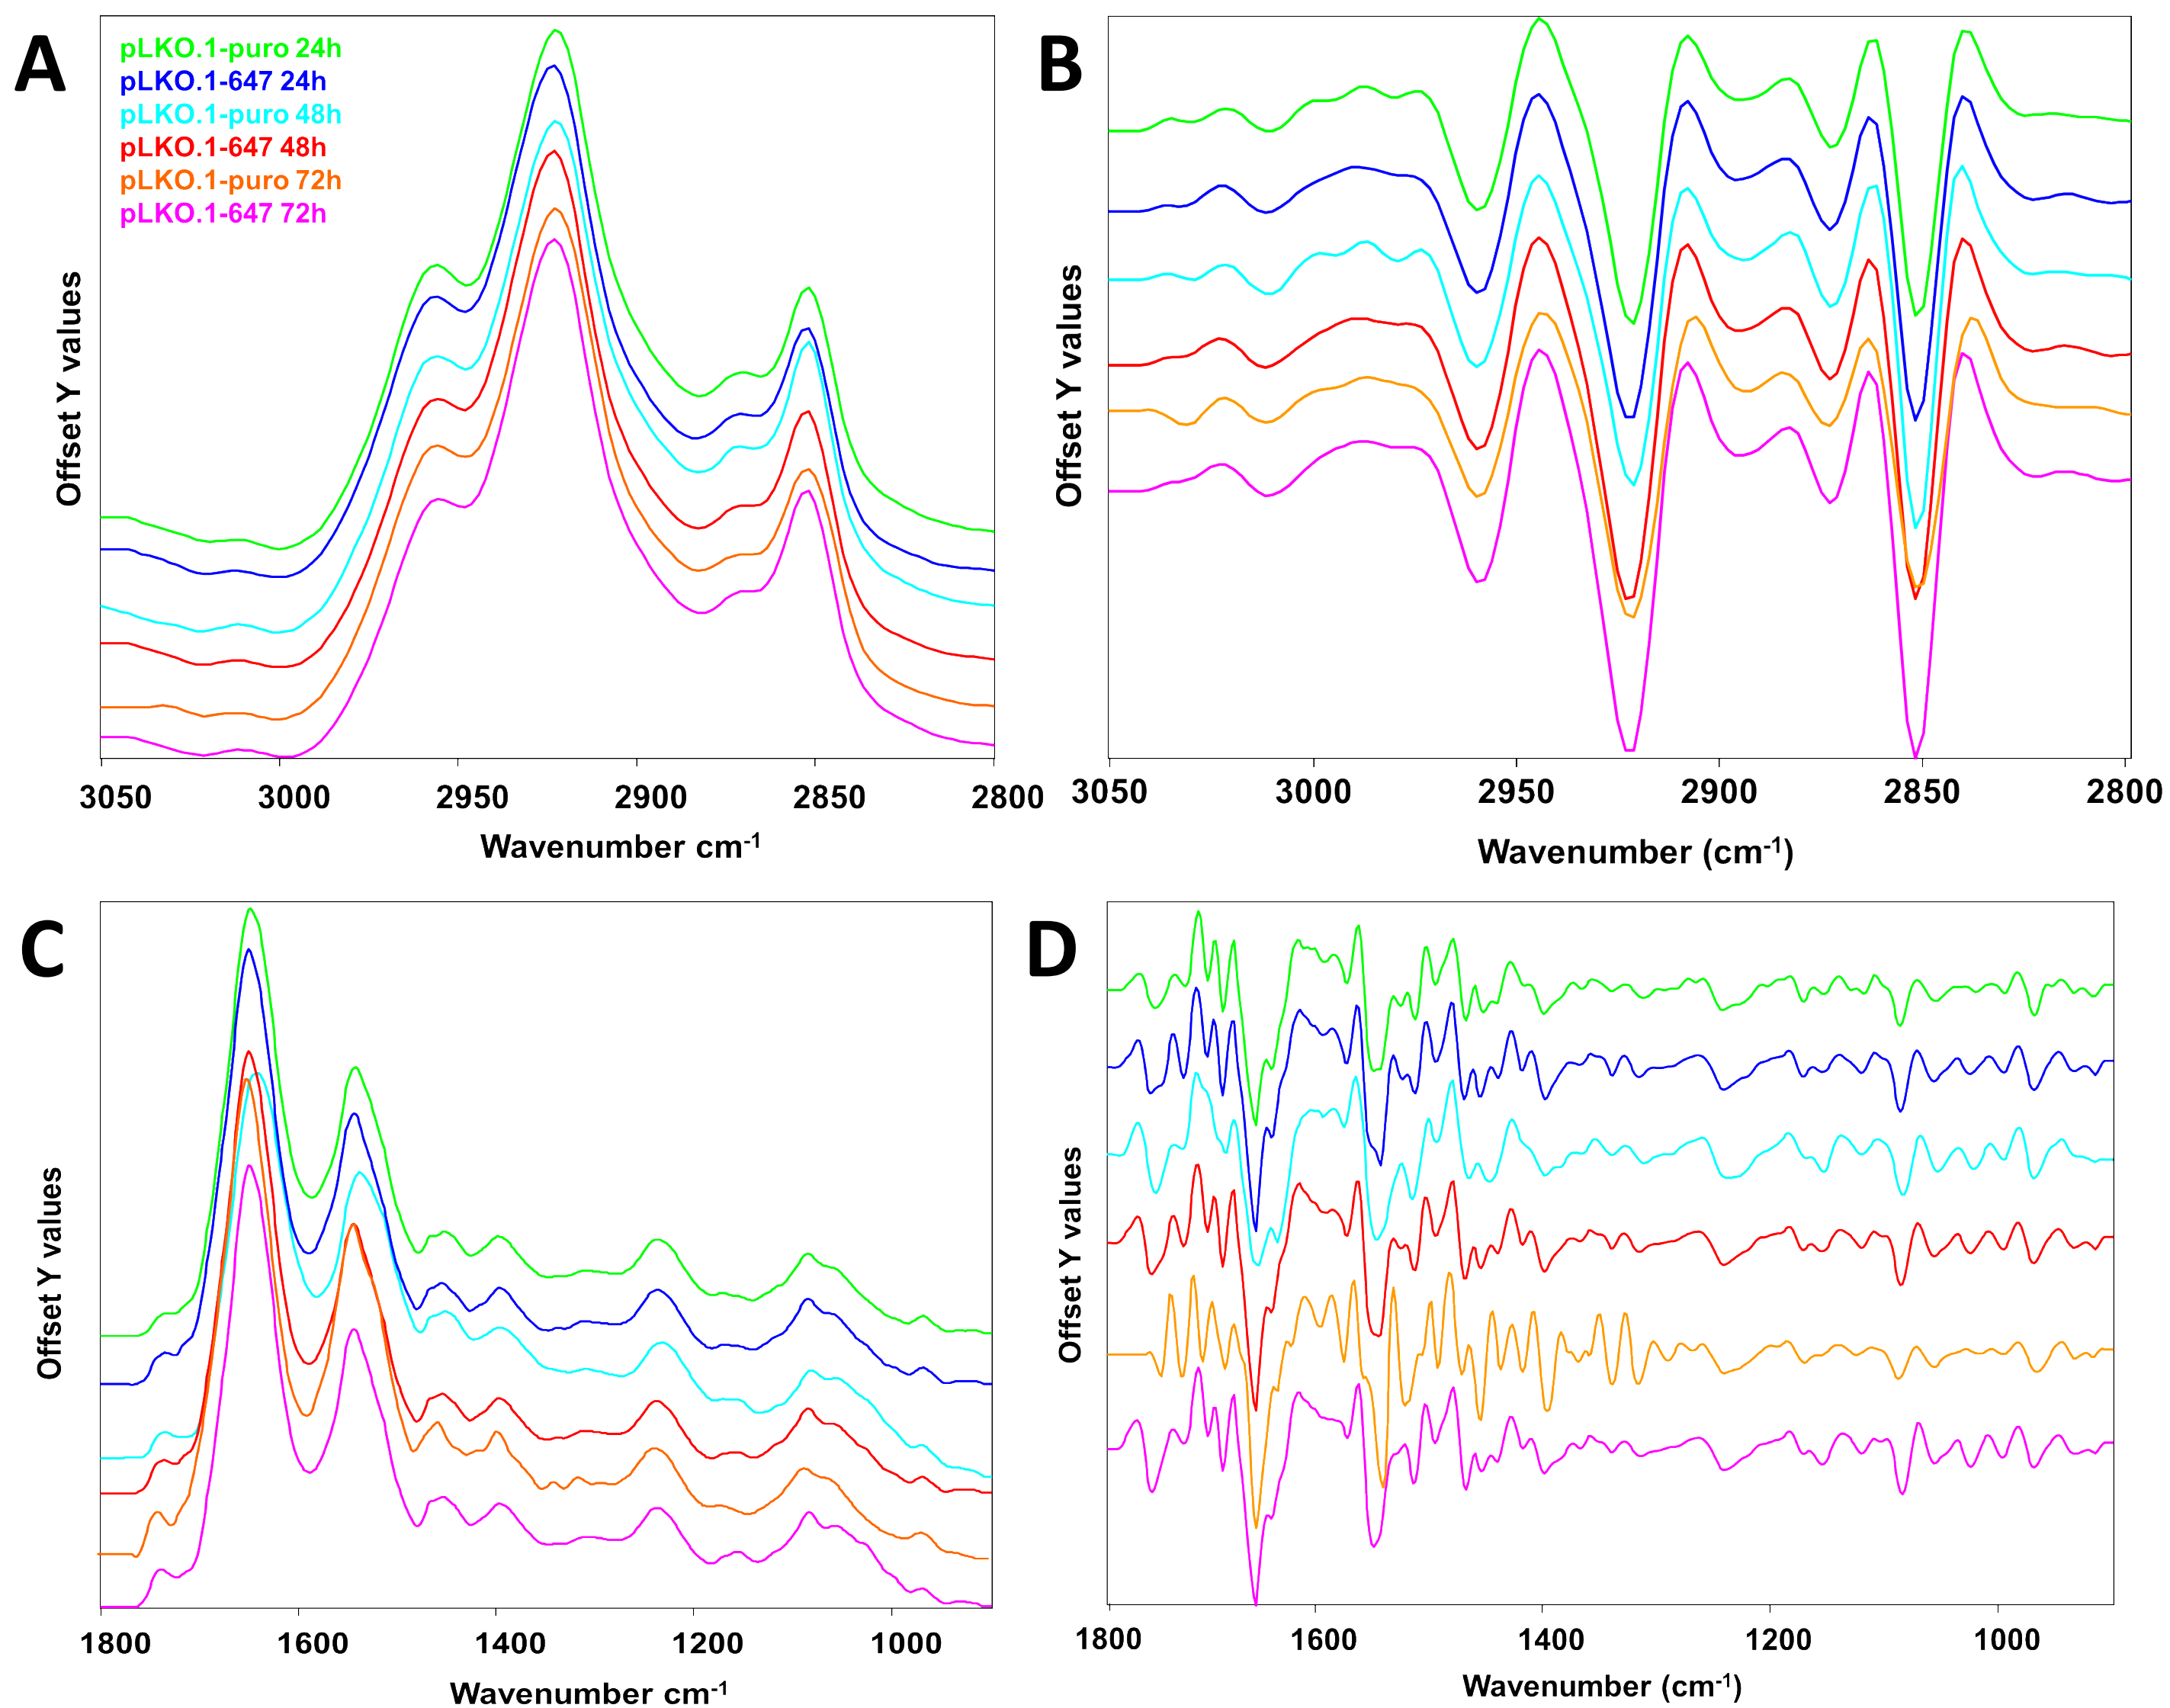

**Figure S2:** HOC621 IR spectra shifted along Y axis for a better comprehension and reported in 3050-2800  $\text{cm}^{-1}$  spectral range in absorbance values **A**), and in second derivative mode **B**); in 1800-900  $\text{cm}^{-1}$  spectral range in absorbance values **C**), and in second derivative mode **D**).
